# Supplementary material for: Enhanced room-temperature magnetoresistance in self-assembled Ag-coated multiphasic chromium oxide nanocomposites
Source: Royal Society of Chemistry journal article supplement (doi:10.1039/c6cp03585j), 2016-01-01
Supplement: c6cp03585j1.pdf [file c6cp03585j1.pdf]

### Rietveld refinement data

| As-synthesized sample                                            |                   |                   | Sample calcined at 300°C                                         |                   |                   | Sample calcined at 350°C                                         |                   |                   | Sample calcined at 400°C                                         |                   |                   |
|------------------------------------------------------------------|-------------------|-------------------|------------------------------------------------------------------|-------------------|-------------------|------------------------------------------------------------------|-------------------|-------------------|------------------------------------------------------------------|-------------------|-------------------|
| $2\theta$ (°)<br>(hkl)                                           | $d_{obs}$<br>(nm) | $d_{cal}$<br>(nm) |
| <b>CrO<sub>2</sub> peaks</b>                                     |                   |                   |                                                                  |                   |                   |                                                                  |                   |                   |                                                                  |                   |                   |
| 28.51<br>(110)                                                   | 0.3128            | 0.3128            | 28.76<br>(110)                                                   | 0.3101            | 0.3100            | 29.13<br>(110)                                                   | 0.3063            | 0.3063            | 28.77<br>(110)                                                   | 0.3100            | 0.3100            |
| 36.19<br>(101)                                                   | 0.2480            | 0.2488            | 45.18<br>(210)                                                   | 0.2005            | 0.1961            | 42.71<br>(111)                                                   | 0.2116            | 0.2150            | 56.82<br>(211)                                                   | 0.1619            | 0.1623            |
| 40.78<br>(200)                                                   | 0.2211            | 0.2212            | 56.88<br>(211)                                                   | 0.1617            | 0.1649            | 45.57<br>(210)                                                   | 0.1989            | 0.1937            |                                                                  |                   |                   |
| 42.43<br>(111)                                                   | 0.2129            | 0.2169            | 59.72<br>(220)                                                   | 0.1547            | 0.1550            | 56.08<br>(211)                                                   | 0.1639            | 0.1630            |                                                                  |                   |                   |
| 56.23<br>(211)                                                   | 0.1635            | 0.1653            |                                                                  |                   |                   |                                                                  |                   |                   |                                                                  |                   |                   |
| 59.02<br>(220)                                                   | 0.1564            | 0.1564            |                                                                  |                   |                   |                                                                  |                   |                   |                                                                  |                   |                   |
| <b><math>a = 0.4424</math> nm<br/><math>c = 0.3009</math> nm</b> |                   |                   | <b><math>a = 0.4384</math> nm<br/><math>c = 0.3046</math> nm</b> |                   |                   | <b><math>a = 0.4332</math> nm<br/><math>c = 0.3018</math> nm</b> |                   |                   | <b><math>a = 0.4384</math> nm<br/><math>c = 0.2891</math> nm</b> |                   |                   |
| <b>Ag peaks</b>                                                  |                   |                   |                                                                  |                   |                   |                                                                  |                   |                   |                                                                  |                   |                   |
| 38.57<br>(111)                                                   | 0.2332            |                   | 37.87<br>(111)                                                   | 0.2374            | 0.2374            | 38.27<br>(111)                                                   | 0.2349            | 0.2349            | 44.14<br>(200)                                                   | 0.2049            |                   |
|                                                                  |                   |                   | 44.15<br>(200)                                                   | 0.2054            | 0.2055            | 44.43<br>(200)                                                   | 0.2037            | 0.2035            |                                                                  |                   |                   |
|                                                                  |                   |                   | 64.19<br>(220)                                                   | 0.1449            | 0.1453            | 64.51<br>(220)                                                   | 0.1442            | 0.1439            |                                                                  |                   |                   |
|                                                                  |                   |                   | 77.18<br>(311)                                                   | 0.1235            | 0.1239            | 77.52<br>(311)                                                   | 0.1230            | 0.1227            |                                                                  |                   |                   |
| <b><math>a = 0.4039</math> nm</b>                                |                   |                   | <b><math>a = 0.4111</math> nm</b>                                |                   |                   | <b><math>a = 0.4070</math> nm</b>                                |                   |                   | <b><math>a = 0.4098</math> nm</b>                                |                   |                   |
